# Supplementary material
Source: MDPI journal article supplement (https://www.mdpi.com/2073-4433/15/5/595)
Supplement: s1 [file s1]

# Supplementary Materials:

Tesfaye Dessu Geleta <sup>1,\*</sup>, Diriba Korecha Dadi <sup>2</sup>, Weyessa Garedew <sup>3</sup> and Adefires Worku <sup>4</sup>

List of Supplementary(S) Tables and Figures

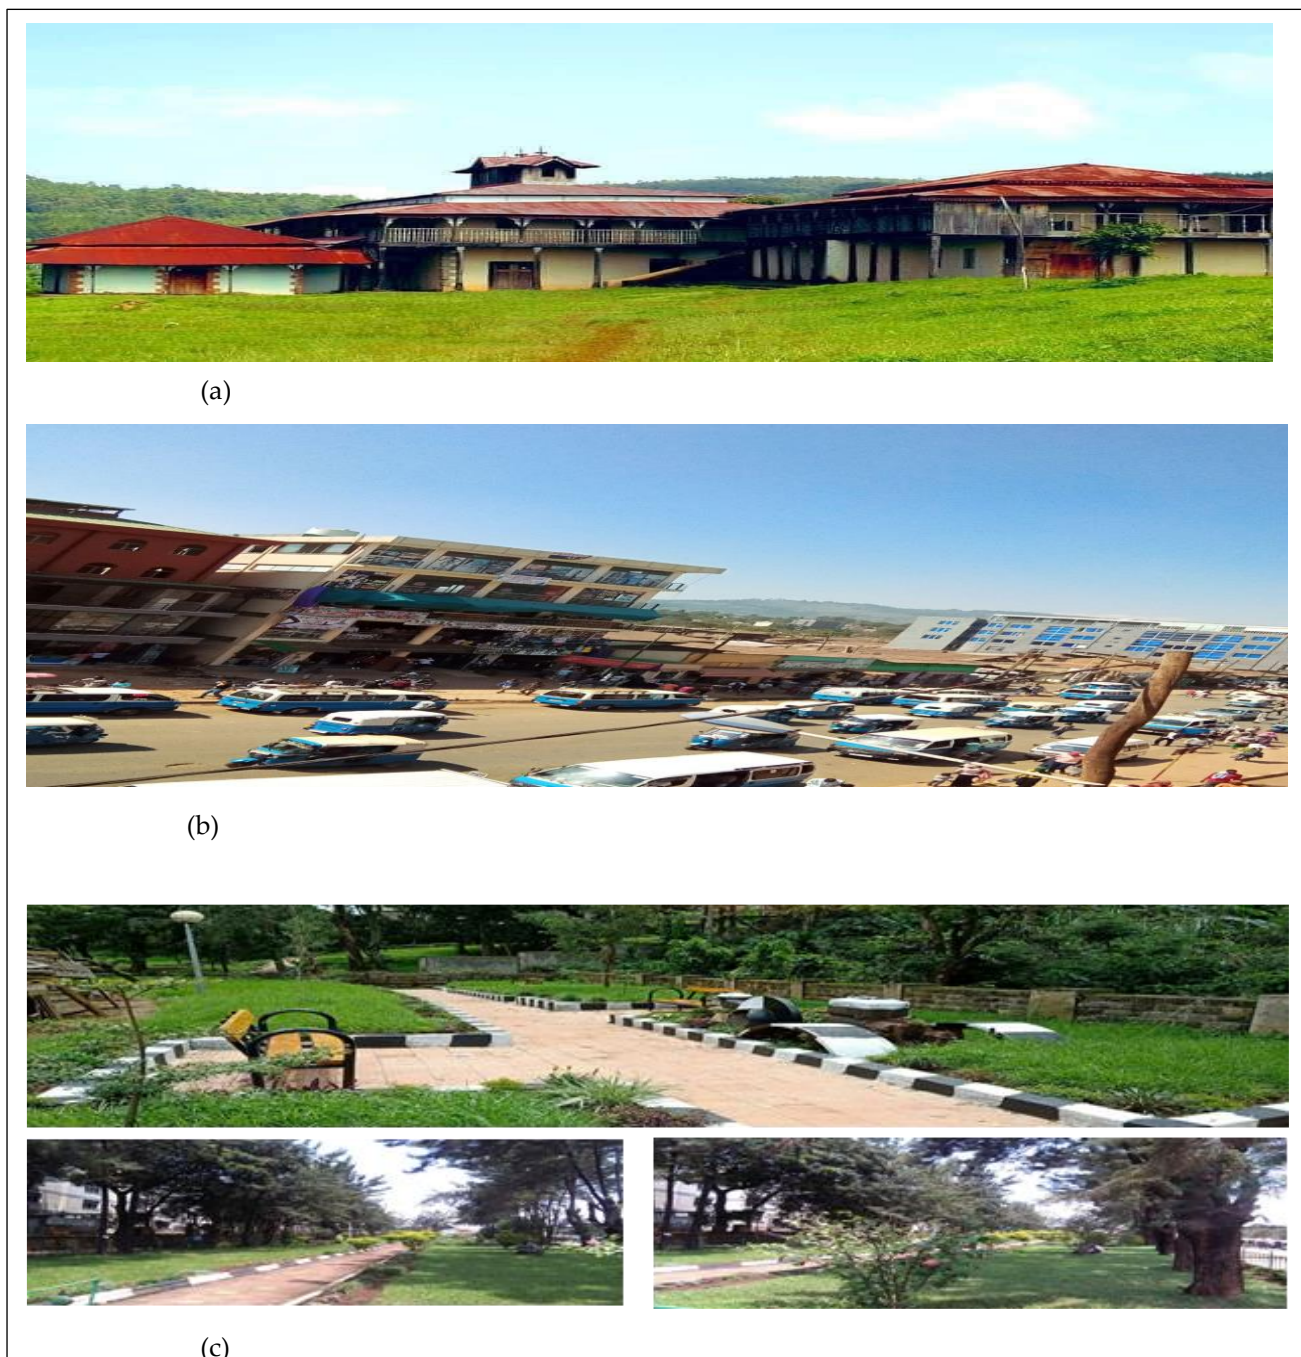

**Figure S1.** Partial overview of Jimma city plates (a) Historical Abba Jifar palace built in 1930's (b) city business core with congested buildings and vehicles, low vegetation and more heat warming (c) greenery areas based on field observation conducted during the period of 2019 to 2021.

**Table S1.** Adaptive capacity of study urban center municipalities based on a field survey of households conducted during the period from 2019 to 2021.

| Variables                                                                                                                      | Descriptions | Selected urban centers/ towns |         |       |         |       |    |
|--------------------------------------------------------------------------------------------------------------------------------|--------------|-------------------------------|---------|-------|---------|-------|----|
|                                                                                                                                |              | Jimma                         | Bedelle | Bonga | Sokorru | Total | %  |
| <b>What is your opinion about adaptive capacity of Municipality in reducing during climate change extreme events occurred?</b> | 1) Excellent | 1                             | 2       | 0     | 0       | 3     | 1  |
|                                                                                                                                | 2) Very Good | 1                             | 3       | 4     | 4       | 12    | 3  |
|                                                                                                                                | 3) Good      | 12                            | 14      | 8     | 10      | 44    | 11 |
|                                                                                                                                | 4) Fair      | 35                            | 6       | 2     | 12      | 55    | 14 |
|                                                                                                                                | 5) Poor      | 103                           | 42      | 15    | 34      | 194   | 51 |
|                                                                                                                                | 6) Very Poor | 40                            | 18      | 12    | 6       | 76    | 20 |

**Table S2.** Socio demographic characteristics of Key informants in urban centers conducted during the period from 2019 to 2021.

| Background information                                                                              | Descriptions              | Selected urban centers/ towns |         |       |         |       |     |
|-----------------------------------------------------------------------------------------------------|---------------------------|-------------------------------|---------|-------|---------|-------|-----|
|                                                                                                     |                           | Jimma                         | Bedelle | Bonga | Sokorru | Total | %   |
| <b>Sex</b>                                                                                          | 1) Male                   | 13                            | 12      | 12    | 12      | 49    | 89  |
|                                                                                                     | 2) Female                 | 2                             | 1       | 2     | 1       | 6     | 11  |
|                                                                                                     | Total                     | 15                            | 13      | 14    | 13      | 55    | 100 |
| <b>Age</b>                                                                                          | 1) 15-24years             | 1                             | 0       | 2     | 1       | 4     | 7   |
|                                                                                                     | 2) 25-34                  | 3                             | 7       | 6     | 9       | 25    | 45  |
|                                                                                                     | 3) 35-44                  | 3                             | 1       | 1     | 3       | 8     | 15  |
|                                                                                                     | 4) 45-54                  | 6                             | 5       | 4     | 0       | 15    | 27  |
|                                                                                                     | 5) 55-64                  | 2                             | 0       | 1     | 0       | 3     | 6   |
|                                                                                                     | 6) 65 and above           | 0                             | 0       | 0     | 0       | 0     | 0   |
| <b>Educational status</b>                                                                           | 1) Diploma                | 2                             | 0       | 2     | 0       | 4     | 7   |
|                                                                                                     | 2) 1 <sup>st</sup> degree | 6                             | 12      | 10    | 12      | 40    | 73  |
|                                                                                                     | 3) 2 <sup>nd</sup> degree | 7                             | 1       | 2     | 1       | 11    | 20  |
| <b>Position</b>                                                                                     | 1) Expert                 | 4                             | 2       | 4     | 9       | 19    | 34  |
|                                                                                                     | 2) Process owner head     | 6                             | 6       | 8     | 3       | 23    | 42  |
|                                                                                                     | 3) Office Head            | 5                             | 5       | 2     | 1       | 13    | 24  |
| <b>Experience</b>                                                                                   | 1) 1 - 10 years           | 3                             | 2       | 9     | 10      | 24    | 44  |
|                                                                                                     | 2) 11 - 20                | 4                             | 5       | 2     | 4       | 15    | 25  |
|                                                                                                     | 3) 21 to 30               | 5                             | 3       | 2     | 0       | 10    | 18  |
|                                                                                                     | 4) 31 and above           | 3                             | 3       | 1     | 0       | 7     | 13  |
| <b>What are the major production and livelihood activities within your local area of your town?</b> | 1. Trade/Merchant         | 9                             | 10      | 11    | 1       | 31    | 58  |
|                                                                                                     | 2. Agriculture            | 2                             | 2       | 1     | 11      | 16    | 29  |
|                                                                                                     | 3. Other works            | 3                             | 1       | 2     | 1       | 7     | 13  |

**Table S3.** Climate change variability and trends in urban centers by key informant interview conducted during the period from 2019 to 2021.

| Background information                                        | Descriptions | Selected urban centers/ towns |         |       |         |       |    |
|---------------------------------------------------------------|--------------|-------------------------------|---------|-------|---------|-------|----|
|                                                               |              | Jimma                         | Bedelle | Bonga | Sokorru | Total | %  |
| <b>Is there climate variability or change particularly in</b> | 1. Yes       | 15                            | 12      | 13    | 11      | 51    | 93 |
|                                                               | 2. No        | 0                             | 0       | 1     | 0       | 1     | 2  |

|                                                                                                                      |                     |    |    |    |    |    |    |
|----------------------------------------------------------------------------------------------------------------------|---------------------|----|----|----|----|----|----|
| <b>rain fall and temperature in your town in the past three decades?</b>                                             | 3. I do not know    | 0  | 1  | 0  | 2  | 3  | 5  |
|                                                                                                                      |                     |    |    |    |    |    |    |
| Are there changes in temperature and precipitation in your urban area?                                               | 1. Yes              | 15 | 11 | 10 | 13 | 49 | 89 |
|                                                                                                                      | 2. No               | 0  | 0  | 4  | 0  | 4  | 7  |
|                                                                                                                      | 3. I do not know    | 0  | 2  | 0  | 0  | 2  | 4  |
| How do the urban residents perceive climate change?                                                                  | 1. Increasing       | 15 | 11 | 10 | 10 | 46 | 84 |
|                                                                                                                      | 2. Decreasing       | 0  | 0  | 4  | 2  | 6  | 11 |
|                                                                                                                      | 3. I do not know    | 0  | 2  | 0  | 1  | 3  | 5  |
| What are the main causes of climate change in your town?                                                             | 1. Natural          | 0  | 1  | 0  | 0  | 1  | 2  |
|                                                                                                                      | 2. Human            | 8  | 7  | 2  | 7  | 24 | 44 |
|                                                                                                                      | 3. Both             | 7  | 5  | 12 | 6  | 30 | 54 |
| Does role of urbanization has in triggering climate change?                                                          | 1. Yes              | 15 | 11 | 11 | 13 | 50 | 91 |
|                                                                                                                      | 2. No               | 0  | 2  | 3  | 0  | 5  | 9  |
|                                                                                                                      | 3. I do not know    | 0  | 0  | 0  | 0  | 0  | 0  |
| What about the size your town and land use land cover change with respect to the past 20-30 years?                   | 1. Changed          | 15 | 12 | 14 | 12 | 53 | 96 |
|                                                                                                                      | 2. Not changed      | 0  | 0  | 0  | 0  | 0  | 0  |
|                                                                                                                      | 3. I do not imagine | 0  | 1  | 0  | 1  | 2  | 4  |
| Does your town have structural plan or master plan to guide development based on the planned land use at town level? | 1. Yes              | 14 | 12 | 14 | 6  | 46 | 84 |
|                                                                                                                      | 2. No               | 1  | 1  | 0  | 4  | 6  | 11 |
|                                                                                                                      | 3. I do not know    | 0  | 0  | 0  | 3  | 3  | 5  |
| If so, does regulation of urban plan respected by urban actors?                                                      | 1. Yes              | 14 | 4  | 4  | 5  | 27 | 49 |
|                                                                                                                      | 2. No               | 1  | 9  | 10 | 8  | 28 | 51 |
|                                                                                                                      | 3. I do not know    | 0  | 0  | 0  | 0  | 0  | 0  |

**Table S4.** Climate Change impacts by key informants' interview of urban centers conducted during the period from 2019 to 2021.

| Background information                                             | Descriptions                            | Selected urban centers/<br>towns |         |       |         |  | Total | %  |
|--------------------------------------------------------------------|-----------------------------------------|----------------------------------|---------|-------|---------|--|-------|----|
|                                                                    |                                         | Jimma                            | Bedelle | Bonga | Sokorru |  |       |    |
| What is the impact of climate change on urban people's livelihood? | 1. On farming with shortage of products | 10                               | 3       | 0     | 4       |  | 17    | 20 |
|                                                                    | 2. Impair their health                  | 9                                | 3       | 6     | 5       |  | 23    | 28 |
|                                                                    | 3. Infrastructure damage                | 10                               | 5       | 5     | 3       |  | 23    | 28 |
|                                                                    | 4. Loss of assets and life              | 7                                | 0       | 3     | 1       |  | 11    | 13 |
|                                                                    | 5. all impacts happen                   | 7                                | 2       | 0     | 0       |  | 9     | 11 |
| Would you mention any climate change related                       | 1. Drought                              | 5                                | 7       | 1     | 10      |  | 23    | 29 |
|                                                                    | 2. Flooding                             | 12                               | 9       | 10    | 3       |  | 34    | 43 |

|                                         |                                                                 |   |   |    |   |    |    |
|-----------------------------------------|-----------------------------------------------------------------|---|---|----|---|----|----|
| problems happened in the last 30 years? | 3. Landslides                                                   | 5 | 0 | 12 | 4 | 21 | 26 |
|                                         | 4.others specify-health problem (respiratory diseases in Jimma) | 2 | 0 | 0  | 0 | 2  |    |
|                                         |                                                                 |   |   |    |   |    | 2  |

**Table S5.** Climate information and emergency service provision as means of adaptation based on a key informant interview conducted during the period from 2019 to 2021.

| Background information                                                                                                                                   | Descriptions                                           | Selected urban centers/<br>towns |         |       |         |       |    |
|----------------------------------------------------------------------------------------------------------------------------------------------------------|--------------------------------------------------------|----------------------------------|---------|-------|---------|-------|----|
|                                                                                                                                                          |                                                        | Jimma                            | Bedelle | Bonga | Sokorru | Total | %  |
| Is there any early warning information to reduce vulnerability the past 20-30years?                                                                      | 1. Yes                                                 | 1                                | 2       | 2     | 2       | 7     | 13 |
|                                                                                                                                                          | 2. No                                                  | 14                               | 8       | 12    | 7       | 41    | 74 |
|                                                                                                                                                          | 3. I do not know                                       | 0                                | 3       | 0     | 4       | 7     | 13 |
| Your opinion about support delivered to the affected groups or Households satisfactory or not?                                                           | 1. Satisfactory                                        | 3                                | 4       | 1     | 3       | 11    | 20 |
|                                                                                                                                                          | 2. Not satisfactory                                    | 12                               | 9       | 13    | 10      | 44    | 80 |
| What are the immediate actions or measures taken during disaster and risk management to climate change in terms of support provided to affected peoples? | 1. Excellent                                           | 0                                | 0       | 0     | 0       | 0     | 0  |
|                                                                                                                                                          | 2. Very good                                           | 0                                | 2       | 0     | 3       | 5     | 9  |
|                                                                                                                                                          | 3. Good                                                | 2                                | 0       | 3     | 2       | 7     | 13 |
|                                                                                                                                                          | 4. Medium                                              | 10                               | 5       | 7     | 2       | 24    | 43 |
|                                                                                                                                                          | 5. Low                                                 | 3                                | 3       | 3     | 5       | 14    | 24 |
|                                                                                                                                                          | 6. Very low                                            | 1                                | 3       | 1     | 1       | 6     | 11 |
| What are the roles of Municipality / city administration and any other disaster prevention institutions during addressing affected bodies?               | 1. Proactive planning                                  | 14                               | 3       | 0     | 2       | 19    | 19 |
|                                                                                                                                                          | 2. Coordination of urban actors                        | 12                               | 4       | 1     | 6       | 23    | 22 |
|                                                                                                                                                          | 3. Provision of materials and needed emergency support | 13                               | 1       | 6     | 5       | 25    | 24 |
|                                                                                                                                                          | 4. Provision of information                            | 11                               | 2       | 0     | 2       | 15    | 15 |
|                                                                                                                                                          | 5.All                                                  | 10                               | 3       | 7     | 0       | 20    | 20 |

**Table S6.** Climate adaptation assessment by key informant interview conducted during the period from 2019 to 2021.

| Background information                                                                                                                                            | Descriptions                   | Selected urban centers/<br>towns |         |       |         |       |    |
|-------------------------------------------------------------------------------------------------------------------------------------------------------------------|--------------------------------|----------------------------------|---------|-------|---------|-------|----|
|                                                                                                                                                                   |                                | Jimma                            | Bedelle | Bonga | Sokorru | Total | %  |
| Is there responsible organization responsible to address environmental problems and climate change at town level? Would you mention the name of the organization? | Yes, there is responsible body | 11                               | 7       | 6     | 10      | 34    | 62 |
|                                                                                                                                                                   | No, responsible body           | 4                                | 6       | 9     | 3       | 21    | 38 |
|                                                                                                                                                                   | 1. Well-implemented            | 2                                | 0       | 0     | 0       | 2     | 4  |

|                                                                                                                                                                                                     |                                              |    |    |    |    |    |    |
|-----------------------------------------------------------------------------------------------------------------------------------------------------------------------------------------------------|----------------------------------------------|----|----|----|----|----|----|
| What does the policy environment application of national Adaptation plan in your Town?                                                                                                              | 2. Medium                                    | 9  | 4  | 12 | 6  | 31 | 56 |
|                                                                                                                                                                                                     | 3. Not well applied                          | 4  | 9  | 2  | 7  | 22 | 40 |
| If so, have you developed Municipal Adaptation plan at your city level to reverse climate change impacts?                                                                                           | 1. Yes                                       | 0  | 2  | 3  | 2  | 7  | 13 |
|                                                                                                                                                                                                     | 2. No                                        | 15 | 10 | 11 | 11 | 47 | 85 |
|                                                                                                                                                                                                     | 3. I do not know                             | 0  | 1  | 0  | 0  | 1  | 2  |
| Any actions of planned adaptation taken ahead of the risks happened or you take actions later after for example like flooding or land slide catastrophes, drought happened to reduce vulnerability? | 1. Ahead of the risks happened               | 1  | 3  | 0  | 0  | 4  | 7  |
|                                                                                                                                                                                                     | 2. Take actions or measures later (reactive) | 14 | 6  | 13 | 9  | 42 | 76 |
|                                                                                                                                                                                                     | 3. No action                                 | 0  | 4  | 1  | 4  | 9  | 17 |
|                                                                                                                                                                                                     |                                              |    |    |    |    |    |    |

**Table S7.** Constraints of climate adaptation by key informants in urban centers based on a field survey conducted during the period from 2019 to 2021.

| Background information                                                        | Descriptions                                      | Selected urban centers/ towns |         |       |         |       |    |
|-------------------------------------------------------------------------------|---------------------------------------------------|-------------------------------|---------|-------|---------|-------|----|
|                                                                               |                                                   | Jimma                         | Bedelle | Bonga | Sokorru | Total | %  |
| What are the constraints faced by urban residents to adapt to climate change? | 1. Lack of cooperation and coordination           | 10                            | 6       | 2     | 3       | 21    | 18 |
|                                                                               | 2. Lack of commitment                             | 9                             | 4       | 6     | 5       | 24    | 21 |
|                                                                               | 3. Lack of awareness and information              | 12                            | 7       | 11    | 4       | 34    | 30 |
|                                                                               | 4. Lack of adaptive capacity due economic reasons | 11                            | 4       | 3     | 1       | 19    | 16 |
|                                                                               | 5. Lack of participation                          | 9                             | 3       | 4     | 1       | 17    | 15 |

**Table S8.** Capacity of municipality to implement climate adaptation action and level of integration and cooperation of urban actors in urban centers by key informants' interview conducted during the period from 2019 to 2021.

| Background information                                                                                                                                                                   | Descriptions     | Selected urban centers/ towns |         |       |         |       |    |
|------------------------------------------------------------------------------------------------------------------------------------------------------------------------------------------|------------------|-------------------------------|---------|-------|---------|-------|----|
|                                                                                                                                                                                          |                  | Jimma                         | Bedelle | Bonga | Sokorru | Total | %  |
| Do Municipality have capacity to implement adaptation action and reduce vulnerability due to climate change impacts?                                                                     | 1. Yes           | 3                             | 5       | 3     | 3       | 14    | 26 |
|                                                                                                                                                                                          | 2. No            | 12                            | 7       | 11    | 8       | 37    | 67 |
|                                                                                                                                                                                          | 3. I do not know | 1                             | 1       | 0     | 2       | 4     | 7  |
| What about the level of integration and coordination of urban actors (Government, CBOs, NGOs, resident and others) to reverse climate change issues in participatory and planned manner? | 1. Excellent     | 0                             | 0       | 0     | 0       | 0     | 0  |
|                                                                                                                                                                                          | 2. Very good     | 0                             | 1       | 0     | 1       | 2     | 4  |
|                                                                                                                                                                                          | 3. Good          | 1                             | 1       | 0     | 0       | 2     | 4  |
|                                                                                                                                                                                          | 4. Medium        | 8                             | 5       | 6     | 5       | 24    | 44 |
|                                                                                                                                                                                          | 5. Low           | 5                             | 3       | 7     | 6       | 21    | 38 |
|                                                                                                                                                                                          | 6. Very low      | 1                             | 3       | 1     | 1       | 6     | 11 |
